# Supplementary material for: NiO nanomaterials: controlled fabrication, formation mechanism and the application in lithium-ion battery
Source: Royal Society of Chemistry journal article supplement (doi:10.1039/c1ce05567d), 2011-10-26
Supplement: c1ce05567d.pdf [file c1ce05567d.pdf]

# NiO nanomaterials: Controlled fabrication, formation mechanism and the application in lithium-ion battery

*Jianmin Ma,<sup>a,b</sup> Jiaqin Yang,<sup>b</sup> Lifang Jiao,<sup>b</sup> Yuhua Mao,<sup>c</sup> Taihong Wang,<sup>a</sup> Xiaochuan Duan,<sup>b</sup> Jiabiao Lian<sup>b</sup> and Wenjun Zheng<sup>b\*</sup>*

<sup>a</sup>Key Laboratory for Micro-Nano Optoelectronic Devices of Ministry of Education, State Key Laboratory for Chemo/Biosensing and Chemometrics, Hunan University, Changsha, P. R. China

<sup>b</sup>Department of Materials Chemistry, Key Laboratory of Advanced Energy Materials Chemistry (MOE), College of Chemistry, Nankai University, Tianjin, P. R. China. E-mail: [zhwj@nankai.edu.cn](mailto:zhwj@nankai.edu.cn)

<sup>c</sup>Shenzhen Capchem Technology Co., LTD

Corresponding Author: Prof. Wenjun Zheng

Address: Department of Materials Chemistry, College of Chemistry, Nankai University, Tianjin, P. R. China

Phone: +86-22-23507951

Fax: +86-22-23502604

E-mail: [zhwj@nankai.edu.cn](mailto:zhwj@nankai.edu.cn)

## Supporting Information

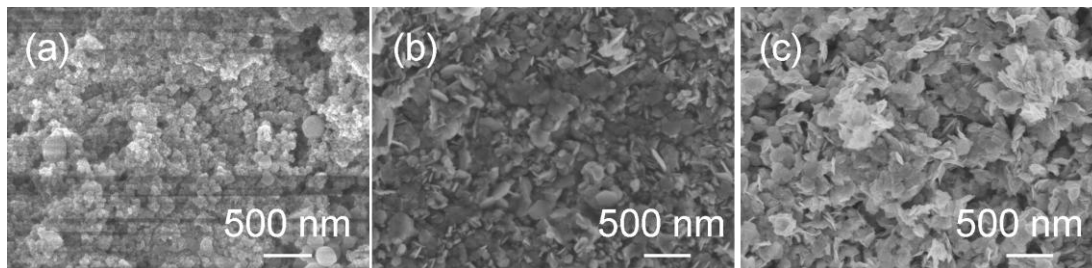

**Figure S1** Morphology evolution of sheaf-like superstructures during different times: (a) 0.5h; (b) 3 h; and (c) 5h.

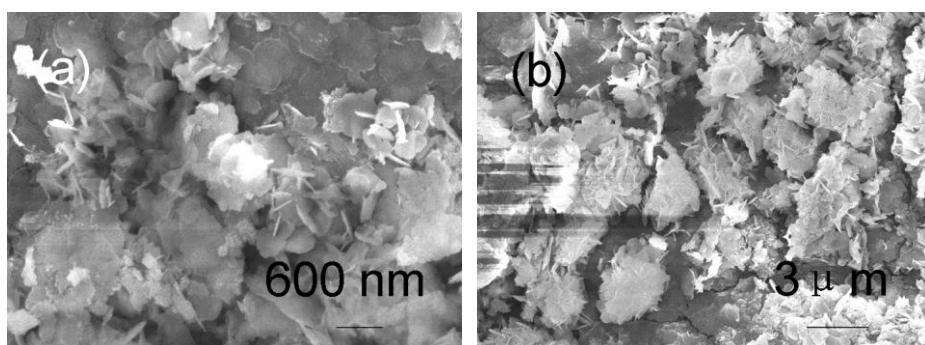

**Figure S2** Morphology evolution of flower-like microspheres during different times: (a) 0.5h and (b) 3h.
